# Supplementary material for: Functionalized epoxy with adjustable fluorescence and UV-shielding enabled by reactive addition of 9-anthracenemethoxyl glycidyl ether
Source: Royal Society of Chemistry journal article supplement (doi:10.1039/d1ra07433d), 2021-01-01
Supplement: d1ra07433d1.pdf [file d1ra07433d1.pdf]

## Supporting Information

### Fluorescent and UV-shielding dual-functional epoxy enabled by reactive addition of 9-anthracenemethoxyl glycidyl ether

Wei Xu\*, Matthew D. Eaton, Sara Moreno-Da Silva, Emilio M. Pérez

*IMDEA Nanoscience, Ciudad Universitaria de Cantoblanco, C/Faraday 9, 28049 Madrid, Spain*

*\*Co-corresponding authors*

*E-mail: wei.xu@imdea.org*

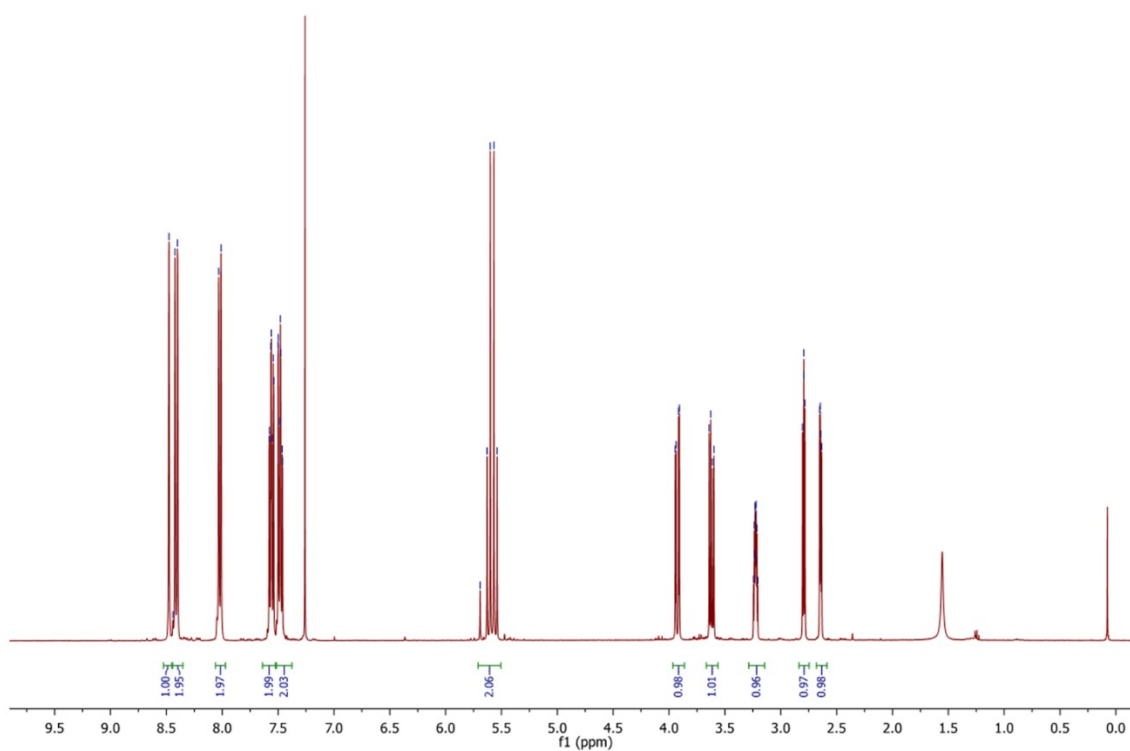

**Figure S1.** <sup>1</sup>H-NMR of synthesized 9-Anthracenemethoxyl glycidyl ether (EAn).

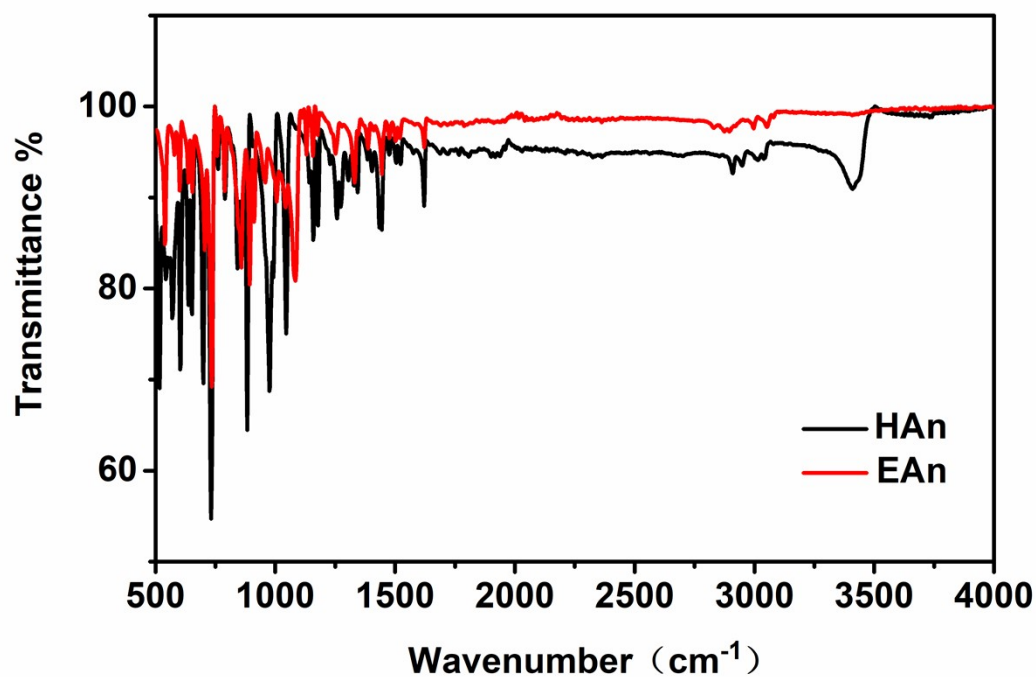

Figure S2. Fourier transform infrared spectroscopy (FTIR) of HAn and EAn.

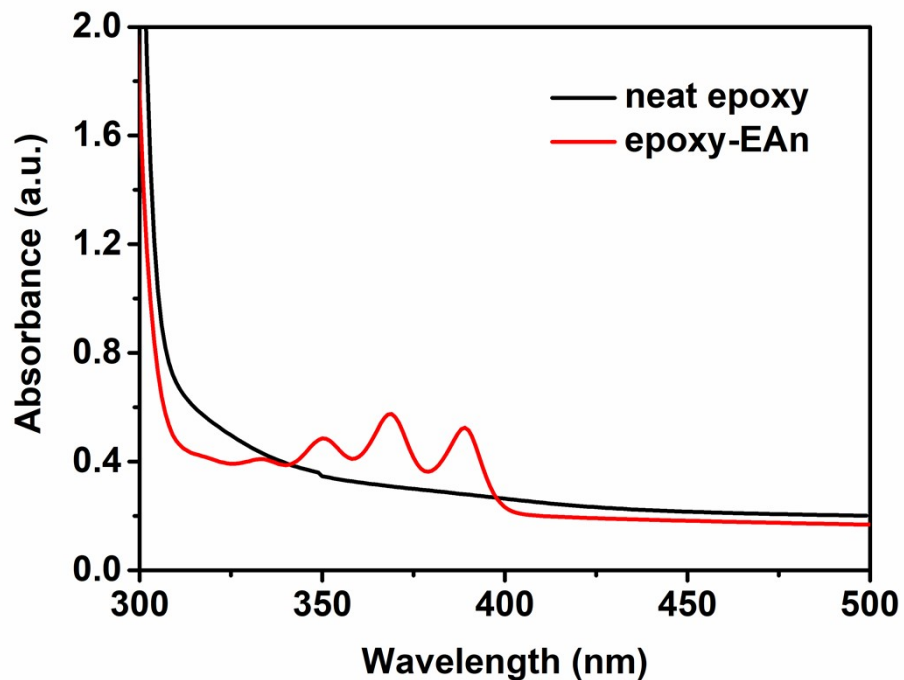

Figure S3. UV-VIS absorption of the neat epoxy and the epoxy-EAn (0.01 % EAn).

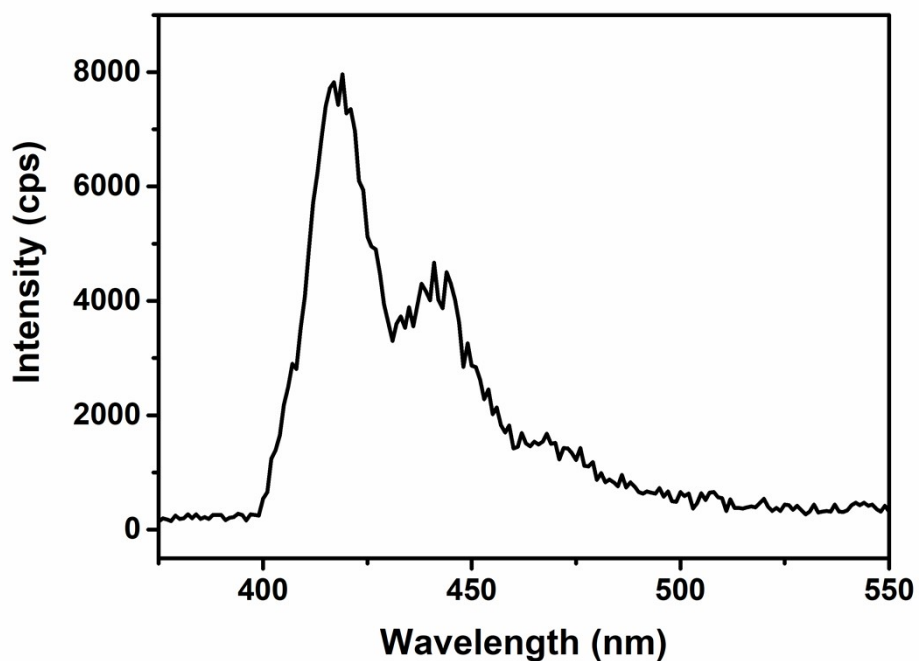

**Figure S4.** Fluorescence emission spectra of epoxy-EAn (0.1 % EAn) under 254 nm.

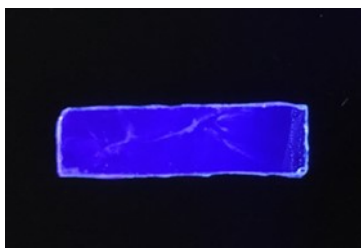

**Figure S5.** Fluorescence of epoxy-EAn after exposure under natural light for 3 months.

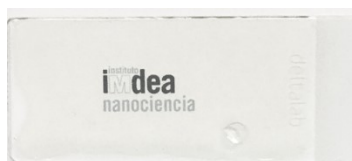

**Figure S6.** Photograph of epoxy-EAn layer under natural light after information input.

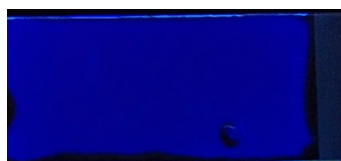

**Figure S7.** Photograph of epoxy-EAn layer under 365 nm UV light after overexposure for information erasure.
